# Supplementary material for: DELISHUS: an efficient and exact algorithm for genome-wide detection of deletion polymorphism in autism
Source: Oxford University Press journal article supplement (doi:10.1093/bioinformatics/bts234), 2012-06-09
Supplement: bioinformatics_28_12_i154_s15.zip [file bioinformatics_28_12_i154_s15.zip]

Archive with 2 entries (2 files):
- Aguiar_245_sup_1_caption.tex
- Aguiar_245_sup_1.pdf
