# Supplementary material for: DELISHUS: an efficient and exact algorithm for genome-wide detection of deletion polymorphism in autism
Source: Oxford University Press journal article supplement (doi:10.1093/bioinformatics/bts234), 2012-06-09
Supplement: bioinformatics_28_12_i154_s15.zip [file bioinformatics_28_12_i154_s15.zip › Aguiar_245_sup_1.pdf]

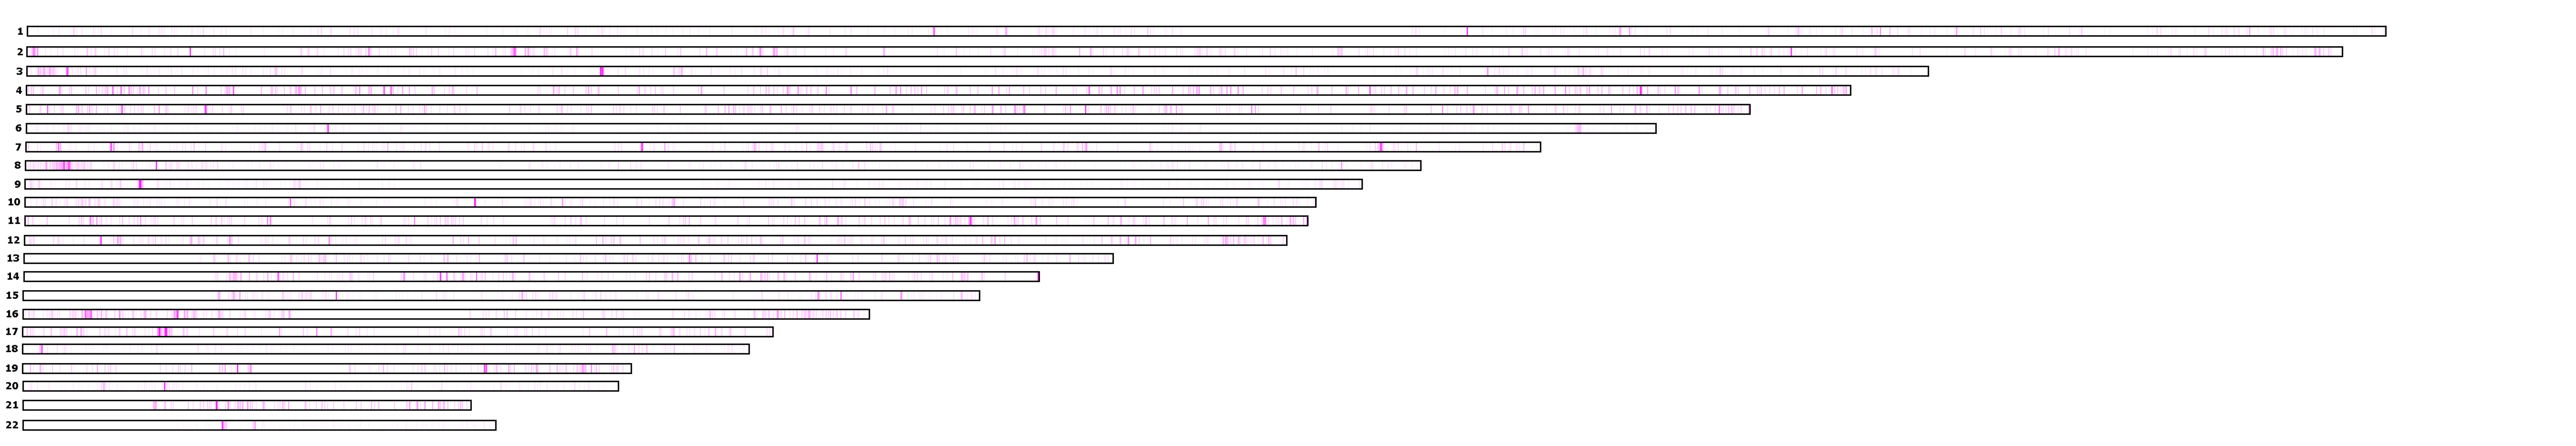

Supplemental Figure 1: DELISHUS produces a deletion map for chromosome-wide or genome-wide runs. This figure is the deletion map for the AGRE autism GWAS autosomal data. DELISHUS was run with a threshold of 5 for inherited deletions. The density of the deletion is represented by the intensity of the violet color and normalized by chromosome.
